# Supplementary material for: Ultrafast transient IR spectroscopy and DFT calculations of ruthenium(ii) polypyridyl complexes
Source: Royal Society of Chemistry journal article supplement (doi:10.1039/c6sc01220e), 2016-08-11
Supplement: c6sc01220e1.pdf [file c6sc01220e1.pdf]

# Ultrafast transient IR spectroscopy and DFT calculations of ruthenium(II) polypyridyl complexes

Qinchao Sun, Bogdan Dereka, Eric Vauthey, Latévi M. Lawson Daku and Andreas Hauser\*

Département de chimie physique, Université de Genève, 30 Quai Ernest-Ansermet, CH-1211 Genève 4, Switzerland

## Supporting Information

Synthesis

Spectroscopy

Kinetic Scheme

Computational study

### Synthesis

All starting chemicals were obtained from commercial sources and were used without further purification.  $\text{RuCl}_3$  was purchased from Fluka, 2, 2'-bipyridine (bpy) and 6-methyl-2, 2'-bipyridine (mbpy) were purchased from Aldrich. 2-methyl-1, 10'-phenanthroline (mphen) was purchased from Shanghai UCHEM Inc.. The complexes  $[\text{Ru}(\text{bpy})_3]^{2+}$ ,<sup>1</sup>  $[\text{Ru}(\text{mbpy})_3]^{2+}$  and  $[\text{Ru}(\text{mphen})_3]^{2+}$  were prepared by literature methods<sup>2</sup> and precipitated as  $[\text{Ru}(\text{bpy})_3](\text{PF}_6)_2$ ,  $[\text{Ru}(\text{mbpy})_3](\text{PF}_6)_2$ ,  $[\text{Ru}(\text{mphen})_3](\text{PF}_6)_2$ .

### Spectroscopy

#### FTIR measurement

All the FTIR experiments were performed on KBr pellet with a Biorad Excalibur Instrument. The spectral resolution was set to  $1 \text{ cm}^{-1}$ . 20 scans were taken for the sample and the background. The KBr pellet was prepared first by grinding approximately 1 mg of ruthenium complexes and 300 mg of KBr (Sigma IR grade potassium bromide) in an agate mortar, and then was pressed at 10 tons of pressure under vacuum.

### Kinetic Scheme

*The details of the calculation of the SADS*

Take a three species:

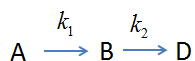

A is the initially excited state (here the  $^3\text{MLCT}$  state), B the intermediate state, and D the ground state. The observed TRIR spectra of this system are the difference spectra with respect to the ground state  $\Delta OD(\lambda, t)$ :

$$\Delta OD = OD_A + OD_B + OD_D - OD_{D0} = \varepsilon_A(\lambda)C_A l + \varepsilon_B(\lambda)C_B l + \varepsilon_D(\lambda)C_D l - \varepsilon_D(\lambda)C_0 l \quad (S1)$$

Where the  $C_i$  are the concentrations of species “i” and the  $\varepsilon_i(\lambda)$  the corresponding extinction coefficients, and with the total concentration  $C_0 = C_D + C_A + C_B$  we obtain:

$$\begin{aligned} \Delta OD(\lambda, t) &= [\varepsilon_A(\lambda) - \varepsilon_D(\lambda)]C_A(t) + [\varepsilon_B(\lambda) - \varepsilon_D(\lambda)]C_B(t) \\ &= \Delta \varepsilon_A(\lambda)C_A(t) + \Delta \varepsilon_B(\lambda)C_B(t) = \Delta OD_A(\lambda, t) + \Delta OD_B(\lambda, t) \end{aligned} \quad (S2)$$

$C_A(t)$  and  $C_B(t)$  can be obtained according to the chemical reaction kinetics as follows:

$$\begin{aligned} \frac{dC_A(t)}{dt} &= -k_1 C_A(t) \\ \frac{dC_B(t)}{dt} &= k_1 C_A(t) - k_2 C_B(t) \end{aligned} \quad (S3)$$

Solving the above coupled differential equations with initial concentrations  $C_A(t=0) = C_0$  and  $C_B(t=0) = 0$  gives:

$$\begin{aligned} C_A(t) &= C_0 e^{-k_1 t} \\ C_B(t) &= C_0 \frac{k_1}{k_1 - k_2} (e^{-k_2 t} - e^{-k_1 t}) \\ C_D(t) &= C_0 - C_A(t) - C_B(t) = C_0 \left( 1 + \frac{k_2 e^{-k_1 t} - k_1 e^{-k_2 t}}{k_1 - k_2} \right) \end{aligned} \quad (S4)$$

The rate constants  $k_1$  and  $k_2$  as well as the species associated difference spectra  $SADS_{A/B}(\lambda) = \Delta \varepsilon_{A/B}(\lambda)C_0 l$  can be obtained by least square global fitting to the experimental spectra. For this a home-built program code<sup>3</sup> based on the Matlab software<sup>4</sup> and the built in matrix operations was used.

## Computational study

### Computational details

Density functional theory (DFT)<sup>5,6</sup> has been applied to the optimization of the ground-state, the <sup>3</sup>MLCT state and <sup>3</sup>dd state geometries of  $[\text{Ru}(\text{bpy})_3]^{2+}$ ,  $[\text{Ru}(\text{mbpy})_3]^{2+}$ , and  $[\text{Ru}(\text{mphen})_3]^{2+}$  in the gas phase and with the PCM method in order to take solvent effects into account. The calculations were performed with the Gaussian 09 program package<sup>7</sup> to characterize  $[\text{Ru}(\text{bpy})_3]^{2+}$ ,  $[\text{Ru}(\text{mbpy})_3]^{2+}$  and  $[\text{Ru}(\text{mphen})_3]^{2+}$  at the mPW1PW91 level in the  $S_0$  ground and in the excited <sup>3</sup>T<sub>1</sub> state. A LANL2DZ basis set was used for the description of the Ru atom,<sup>8</sup> while of the H, N, C and Ru atoms were described by the D95V basis set.<sup>9</sup> The frequency calculations performed on the optimized geometries showed that they all correspond to real minima (no imaginary frequencies). IR spectra were simulated by convoluting the calculated intensities with Lorentzian functions of FWHM of 10 cm<sup>-1</sup> using the GaussSum program.<sup>10</sup>

**Table S1.** Selected bond lengths (Å) in the optimized geometries in acetonitrile (true minima by vibrational analysis) of  $[\text{Ru}(\text{bpy})_3]^{2+}$  in the  $S_0$  ground state and in the  $^3\text{MLCT}$  and  $^3\text{dd}$  states by G09. The \* indicates the ligand on which the electron is localised.

| Ru-N | $S_0$   | $^3\text{MLCT}$ | $^3\text{dd}$ |
|------|---------|-----------------|---------------|
| 1    | 2.07266 | 2.07433         | 2.40638       |
| 2    | 2.07299 | 2.09533         | 2.13187       |
| 3    | 2.07230 | 2.09533         | 2.13182       |
| 4    | 2.07278 | 2.07434         | 2.40647       |
| 5    | 2.07252 | 2.04891*        | 2.08578       |
| 6    | 2.07242 | 2.04892*        | 2.08579       |

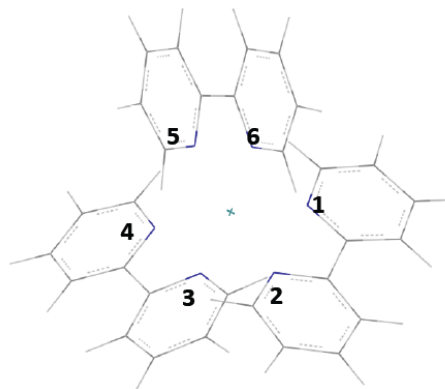

**Table S2.** Selected bond lengths (Å) in the optimized geometries in acetonitrile (true minima by vibrational analysis) of  $[\text{Ru}(\text{mbpy})_3]^{2+}$  in the  $S_0$  ground state and in the  $^3\text{dd}$  states by G09.

| Ru-N | $S_0$   | $^3\text{dd}$ |
|------|---------|---------------|
| 1    | 2.08114 | 2.07758       |
| 2    | 2.15151 | 2.15821       |
| 3    | 2.13532 | 2.50581       |
| 4    | 2.06983 | 2.13332       |
| 5    | 2.06168 | 2.12842       |
| 6    | 2.13675 | 2.48641       |

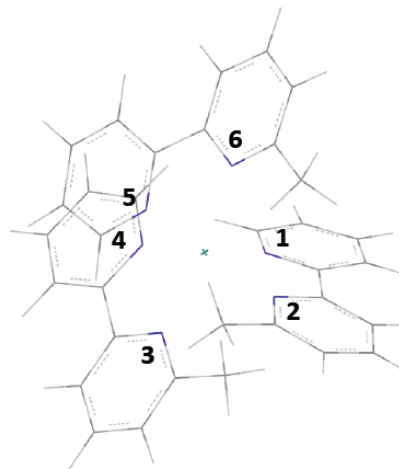

**Table S3.** Selected bond lengths (Å) in the optimized geometries in acetonitrile (true minima by vibrational analysis) of  $[\text{Ru}(\text{mphen})_3]^{2+}$  in the  $S_0$  ground state and in the  $^3\text{MLCT}$  and  $^3\text{dd}$  states by G09. The \* Indicates the ligand on which the electron is localised.

| Ru-N | $S_0$   | $^3\text{MLCT}$ | $^3\text{dd}$ |
|------|---------|-----------------|---------------|
| 1    | 2.08095 | 2.10190         | 2.08142       |
| 2    | 2.15374 | 2.17611         | 2.16979       |
| 3    | 2.13737 | 2.15169         | 2.50153       |
| 4    | 2.07366 | 2.06829         | 2.12679       |
| 5    | 2.06548 | 2.02447*        | 2.12839       |
| 6    | 2.14538 | 2.12483*        | 2.51246       |

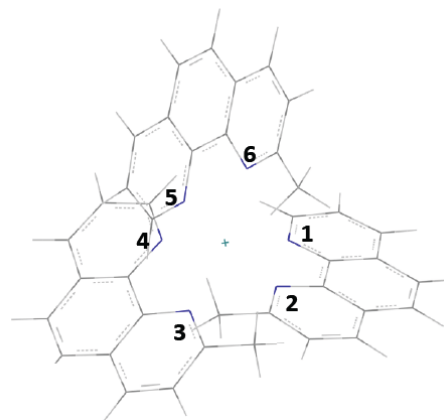

**Table S4.** Zero-point energy and electronic energy differences (  $\Delta E^\circ$ ,  $\Delta E^{\text{el}}$  in  $\text{cm}^{-1}$  ) between the excited state  $^3\text{MLCT}$  and  $^3\text{dd}$  states and the ground state, respectively, of  $[\text{Ru}(\text{bpy})_3]^{2+}$ ,  $[\text{Ru}(\text{mbpy})_3]^{2+}$ , and  $[\text{Ru}(\text{mphen})_3]^{2+}$  under PCM model in acetonitrile.

| G09                                | $\Delta E$             | $^3\text{MLCT}$ | $^3\text{dd}$ | $\Delta E(^3\text{dd}-^3\text{MLCT})$ |
|------------------------------------|------------------------|-----------------|---------------|---------------------------------------|
| $[\text{Ru}(\text{bpy})_3]^{2+}$   | $\Delta E^{\text{el}}$ | 16614           | 18808         | 2194                                  |
|                                    | $\Delta E^\circ$       | 15941           | 17999         | 2058                                  |
| $[\text{Ru}(\text{mbpy})_3]^{2+}$  | $\Delta E^{\text{el}}$ | --              | 14724         | --                                    |
|                                    | $\Delta E^\circ$       | --              | 13854         | --                                    |
| $[\text{Ru}(\text{mphen})_3]^{2+}$ | $\Delta E^{\text{el}}$ | 16723           | 14923         | -1800                                 |
|                                    | $\Delta E^\circ$       | 16164           | 14126         | -2038                                 |

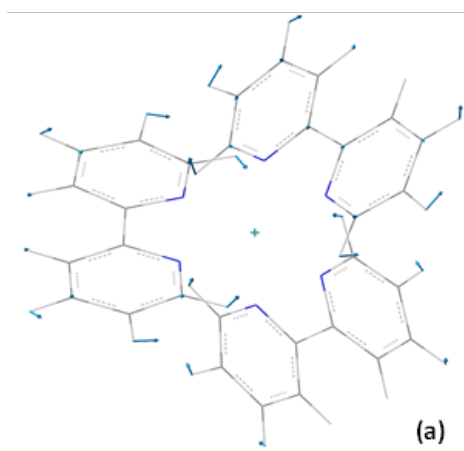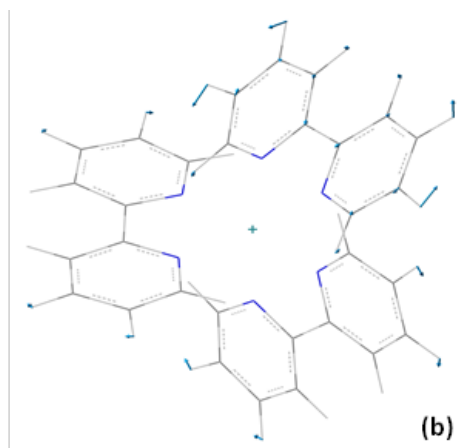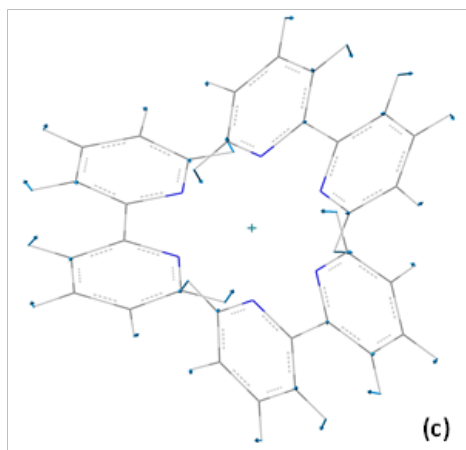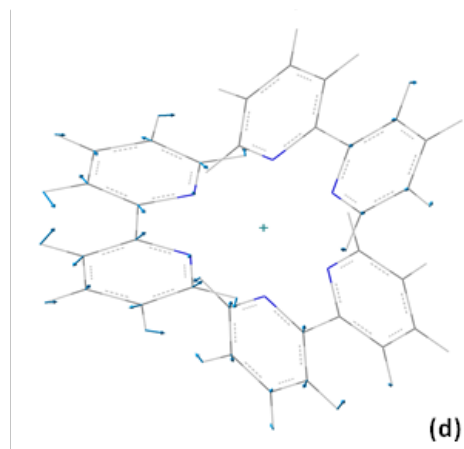

**Figure S1.** Some selected vibrational modes of  $[\text{Ru}(\text{bpy})_3]^{2+}$  in the ground state in vacuum at (a)  $1416\text{ cm}^{-1}$ , (b)  $1436\text{ cm}^{-1}$ , (c)  $1450\text{ cm}^{-1}$ , (d)  $1607\text{ cm}^{-1}$ .

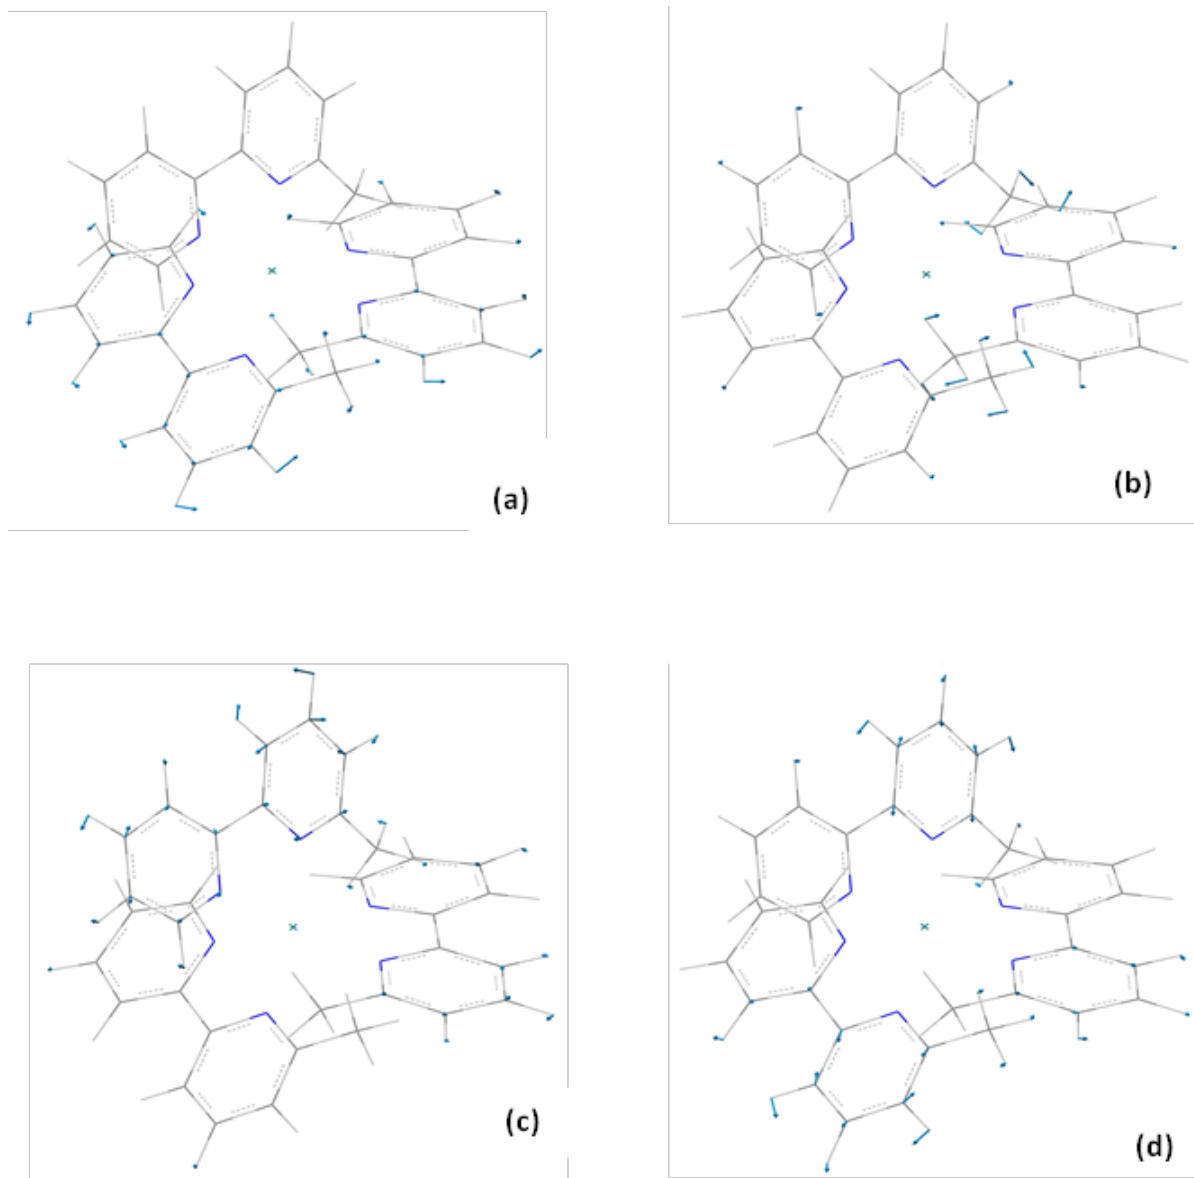

**Figure S2.** Some selected vibrational modes of [Ru(mbpy)<sub>3</sub>]<sup>2+</sup> in the ground state in vacuum at (a) 1450 cm<sup>-1</sup>, (b) 1465 cm<sup>-1</sup>, (c) 1575 cm<sup>-1</sup>, (d) 1608 cm<sup>-1</sup>.

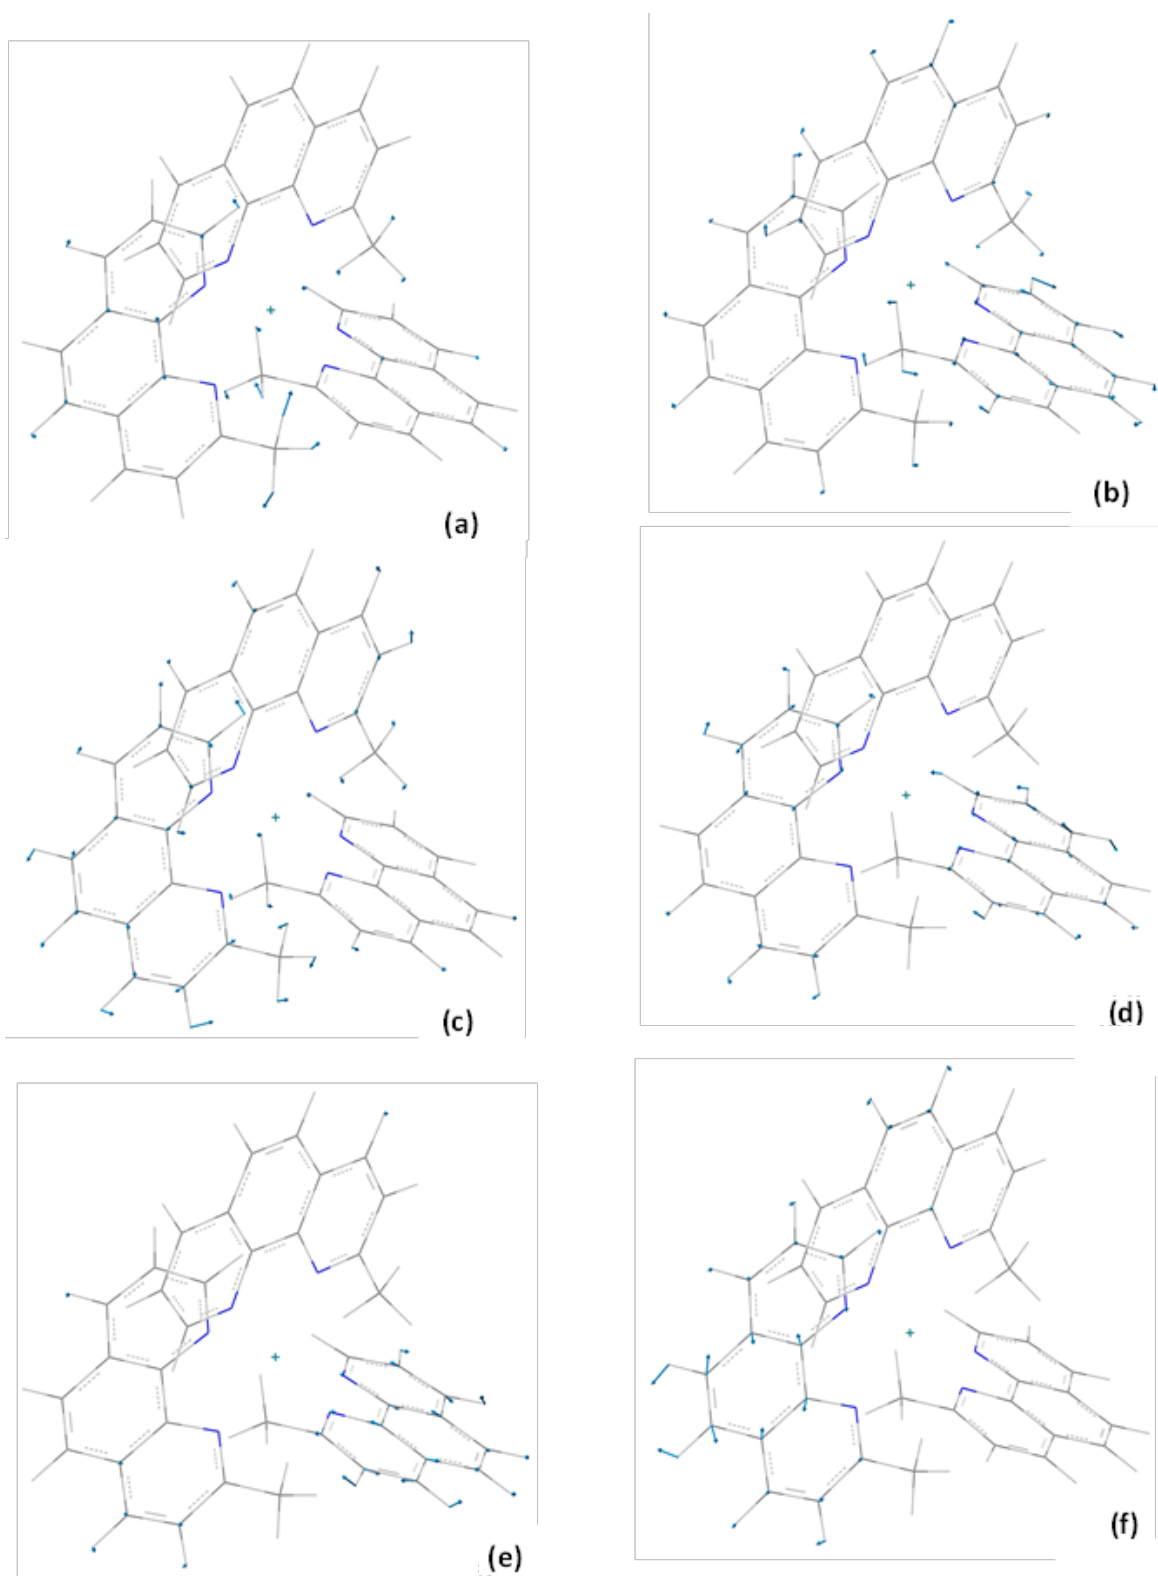

**Figure S3.** Some selected vibrational modes of  $[\text{Ru}(\text{mphen})_3]^{2+}$  in the ground state in vacuum at (a) 1454  $\text{cm}^{-1}$ , (b) 1497  $\text{cm}^{-1}$ , (c) 1512  $\text{cm}^{-1}$ , (d) 1590  $\text{cm}^{-1}$ , (e) 1610  $\text{cm}^{-1}$ , (f) 1637  $\text{cm}^{-1}$ .

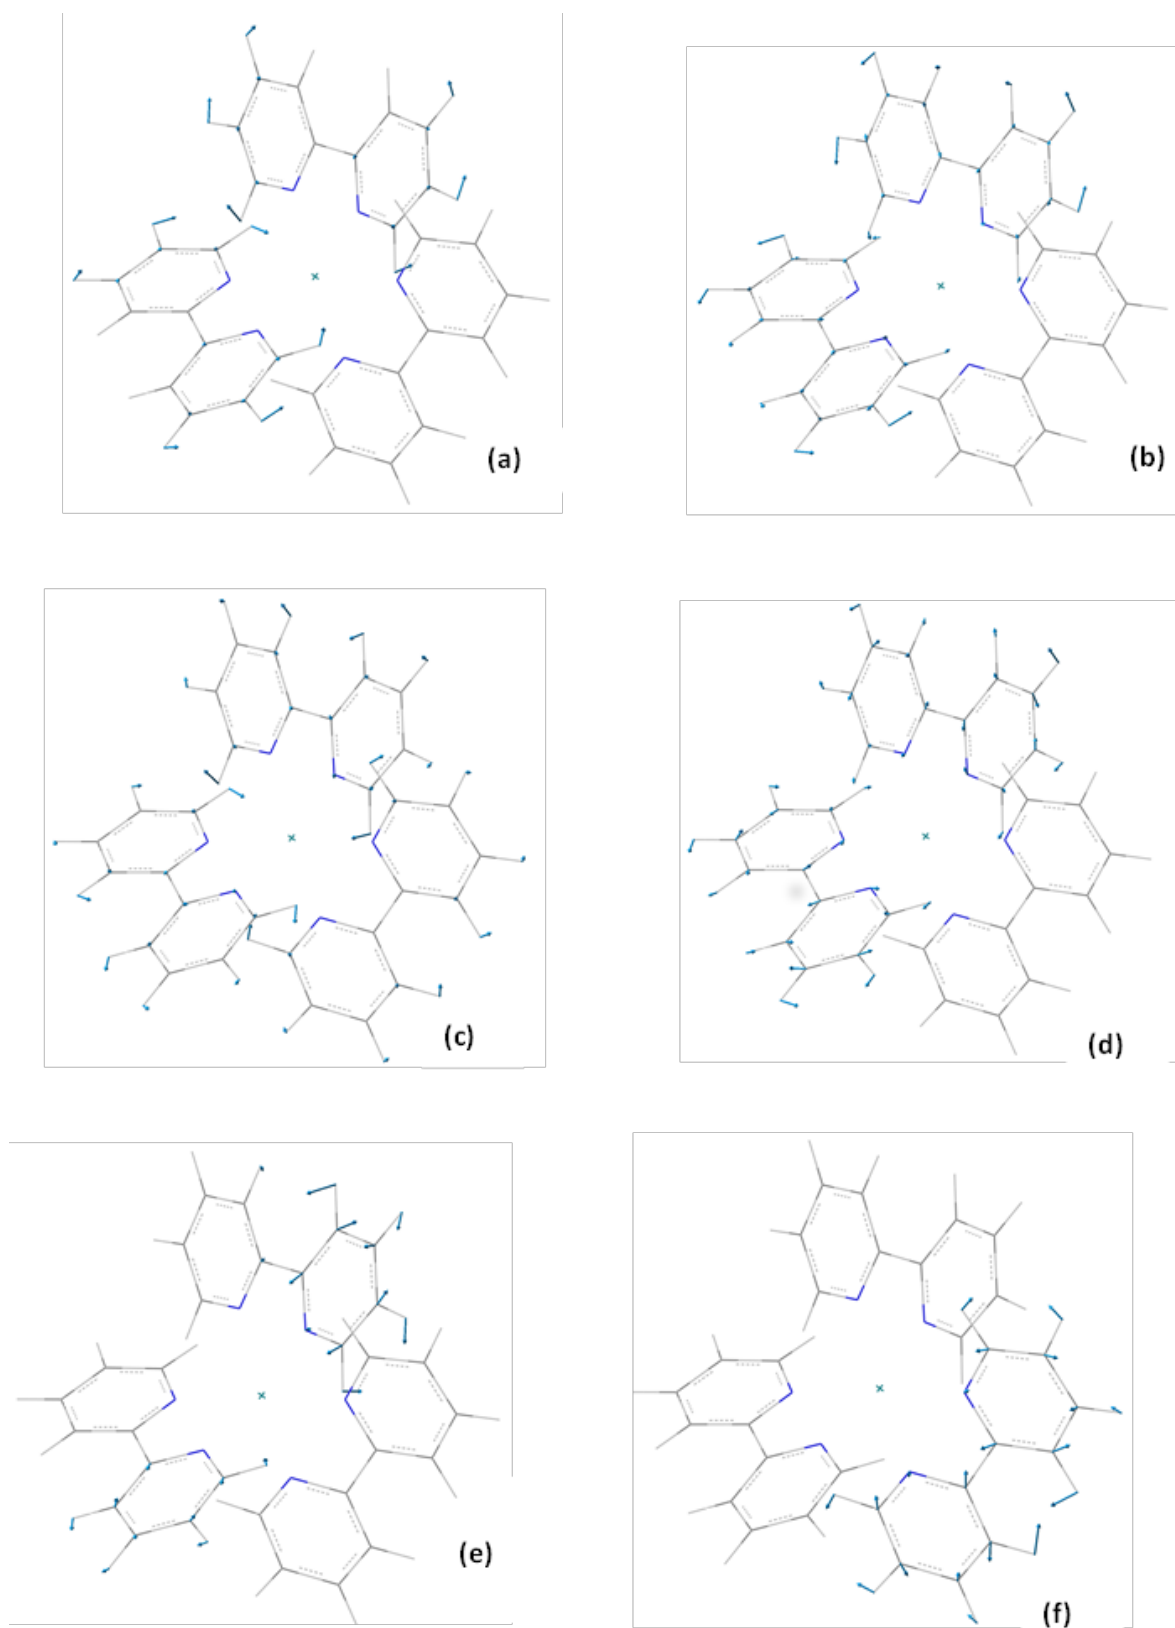

**Figure S4.** Some selected vibrational modes of  $[\text{Ru}(\text{bpy})_3]^{2+}$  in the  $^3\text{dd}$  state at (a)  $1416\text{ cm}^{-1}$ , (b)  $1426\text{ cm}^{-1}$ , (c)  $1450\text{ cm}^{-1}$ , (d)  $1575\text{ cm}^{-1}$ , (e)  $1592\text{ cm}^{-1}$ , (f)  $1610\text{ cm}^{-1}$ .



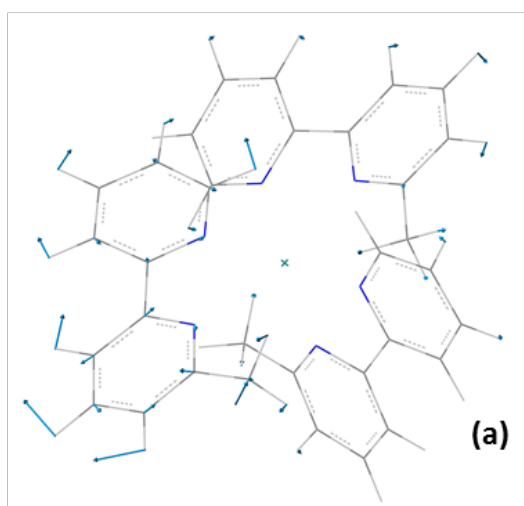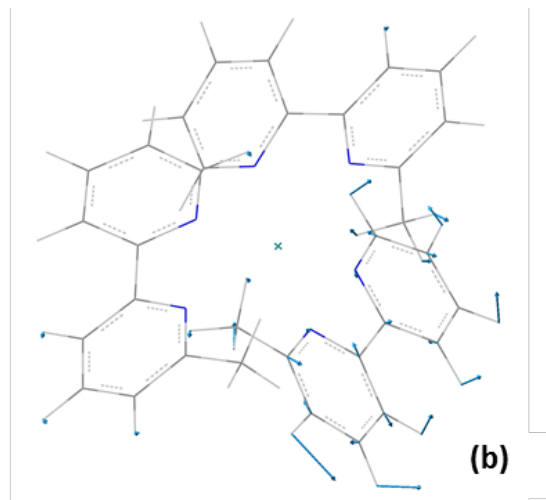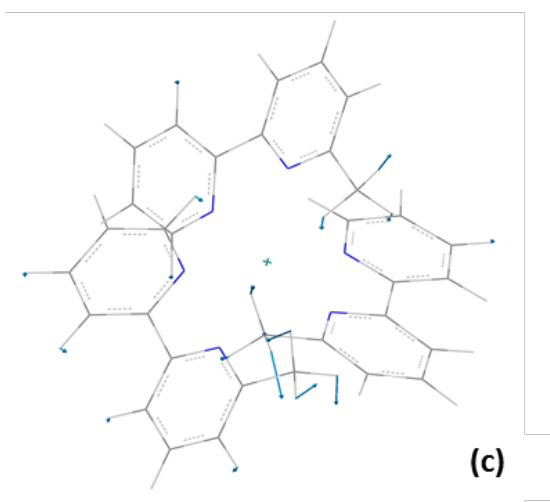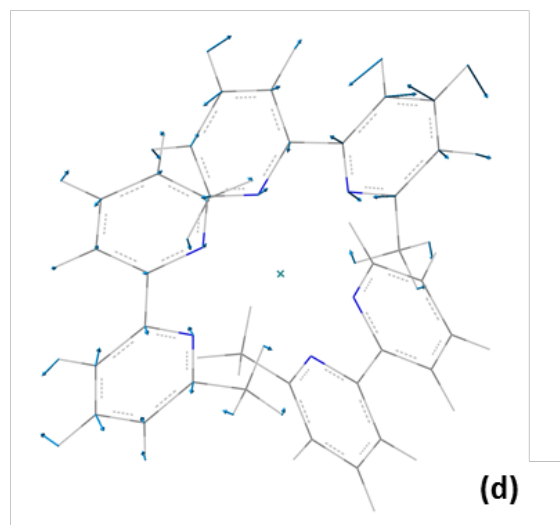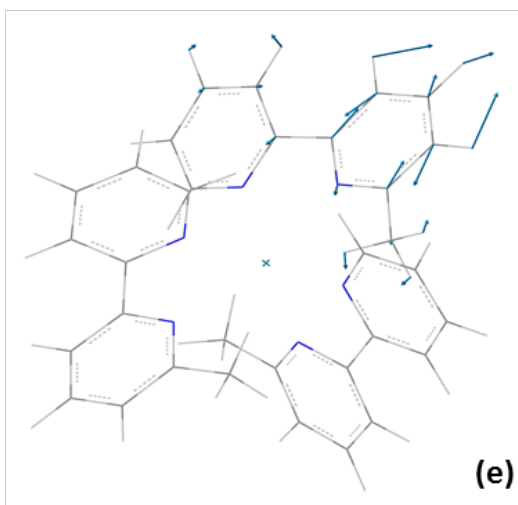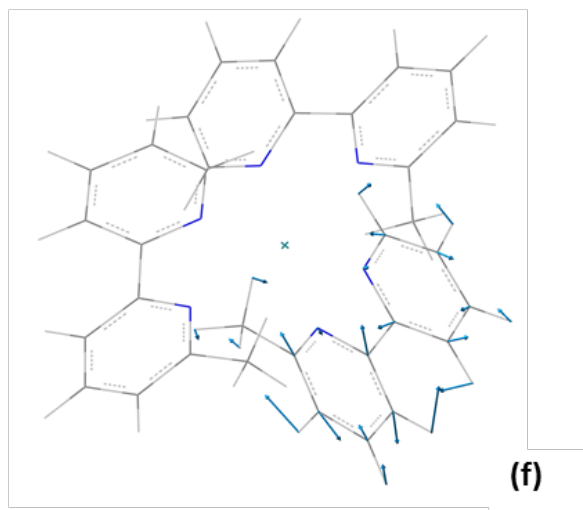

**Figure S5.** Some selected vibrational modes of  $[\text{Ru}(\text{mbpy})_3]^{2+}$  in the  $^3\text{dd}$  state at (a)  $1443\text{ cm}^{-1}$ , (b)  $1448\text{ cm}^{-1}$ , (c)  $1459\text{ cm}^{-1}$ , (d)  $1574\text{ cm}^{-1}$ , (e)  $1594\text{ cm}^{-1}$ , (f)  $1609\text{ cm}^{-1}$ .

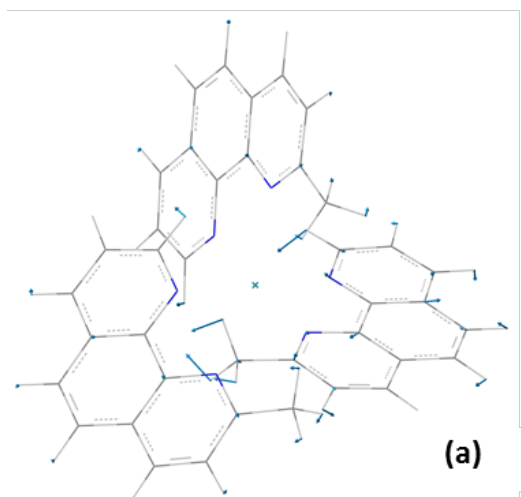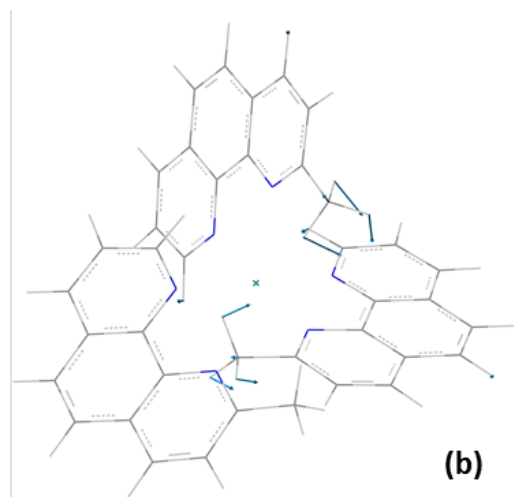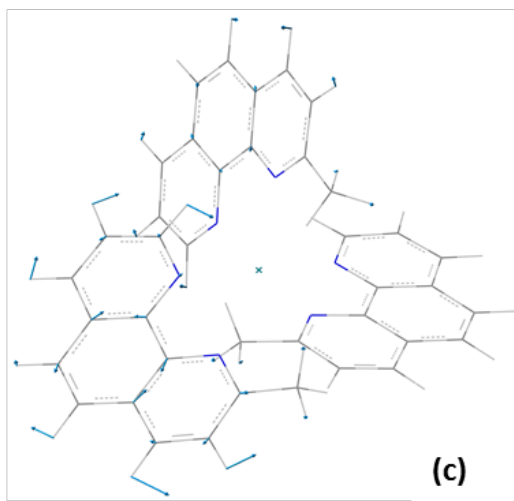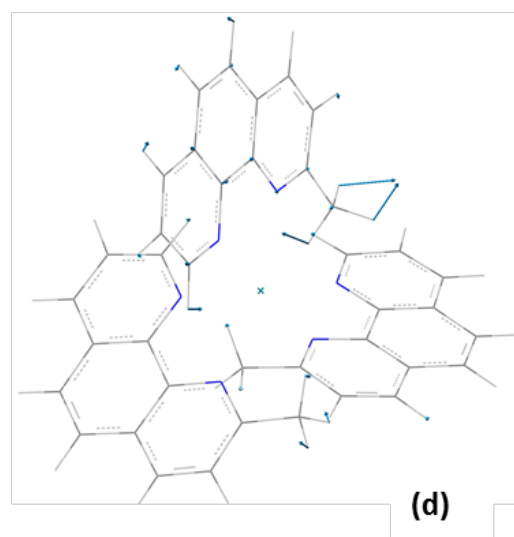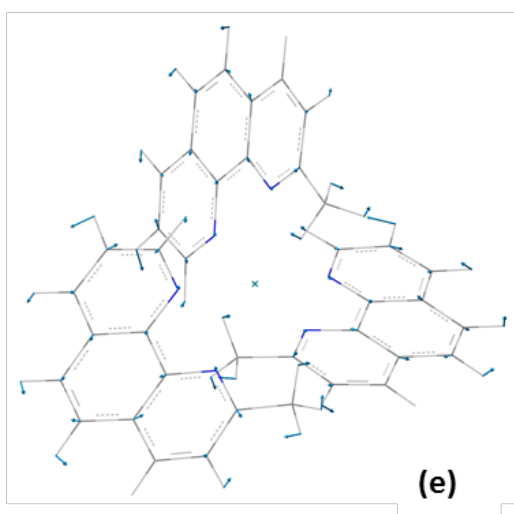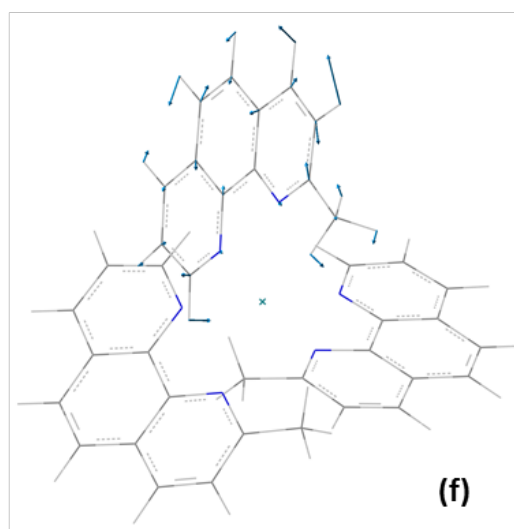

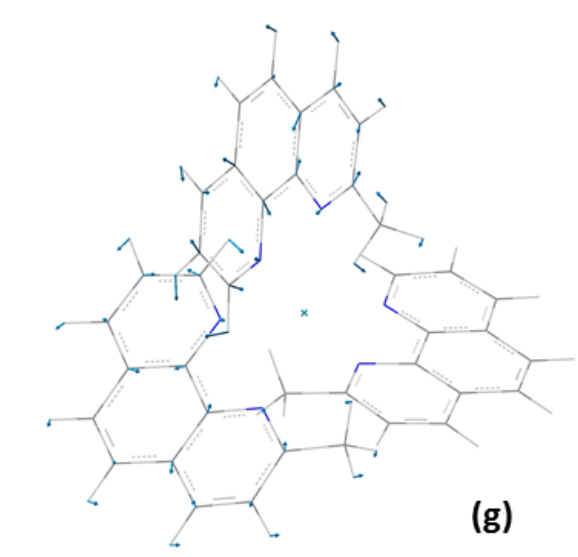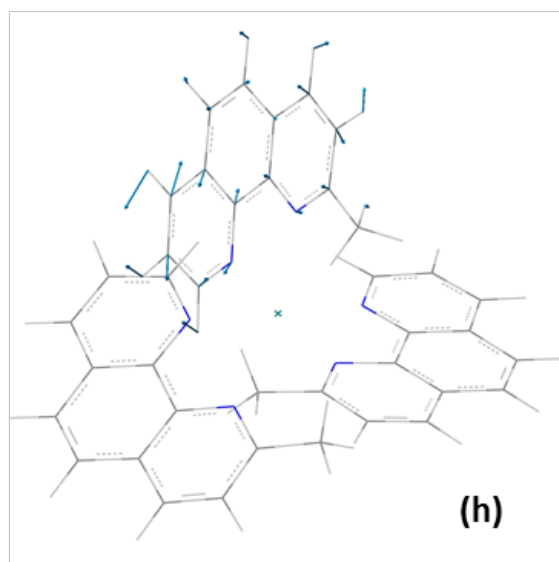

**Figure S6.** Some selected vibrational modes of  $[\text{Ru}(\text{mphen})_3]^{2+}$  in the  $^3\text{dd}$  state at (a)  $1382\text{ cm}^{-1}$ , (b)  $1394\text{ cm}^{-1}$ , (c)  $1428\text{ cm}^{-1}$ , (d)  $1442\text{ cm}^{-1}$ , (e)  $1496\text{ cm}^{-1}$ , (f)  $1508\text{ cm}^{-1}$ , (g)  $1561\text{ cm}^{-1}$ , (h)  $1588\text{ cm}^{-1}$ .

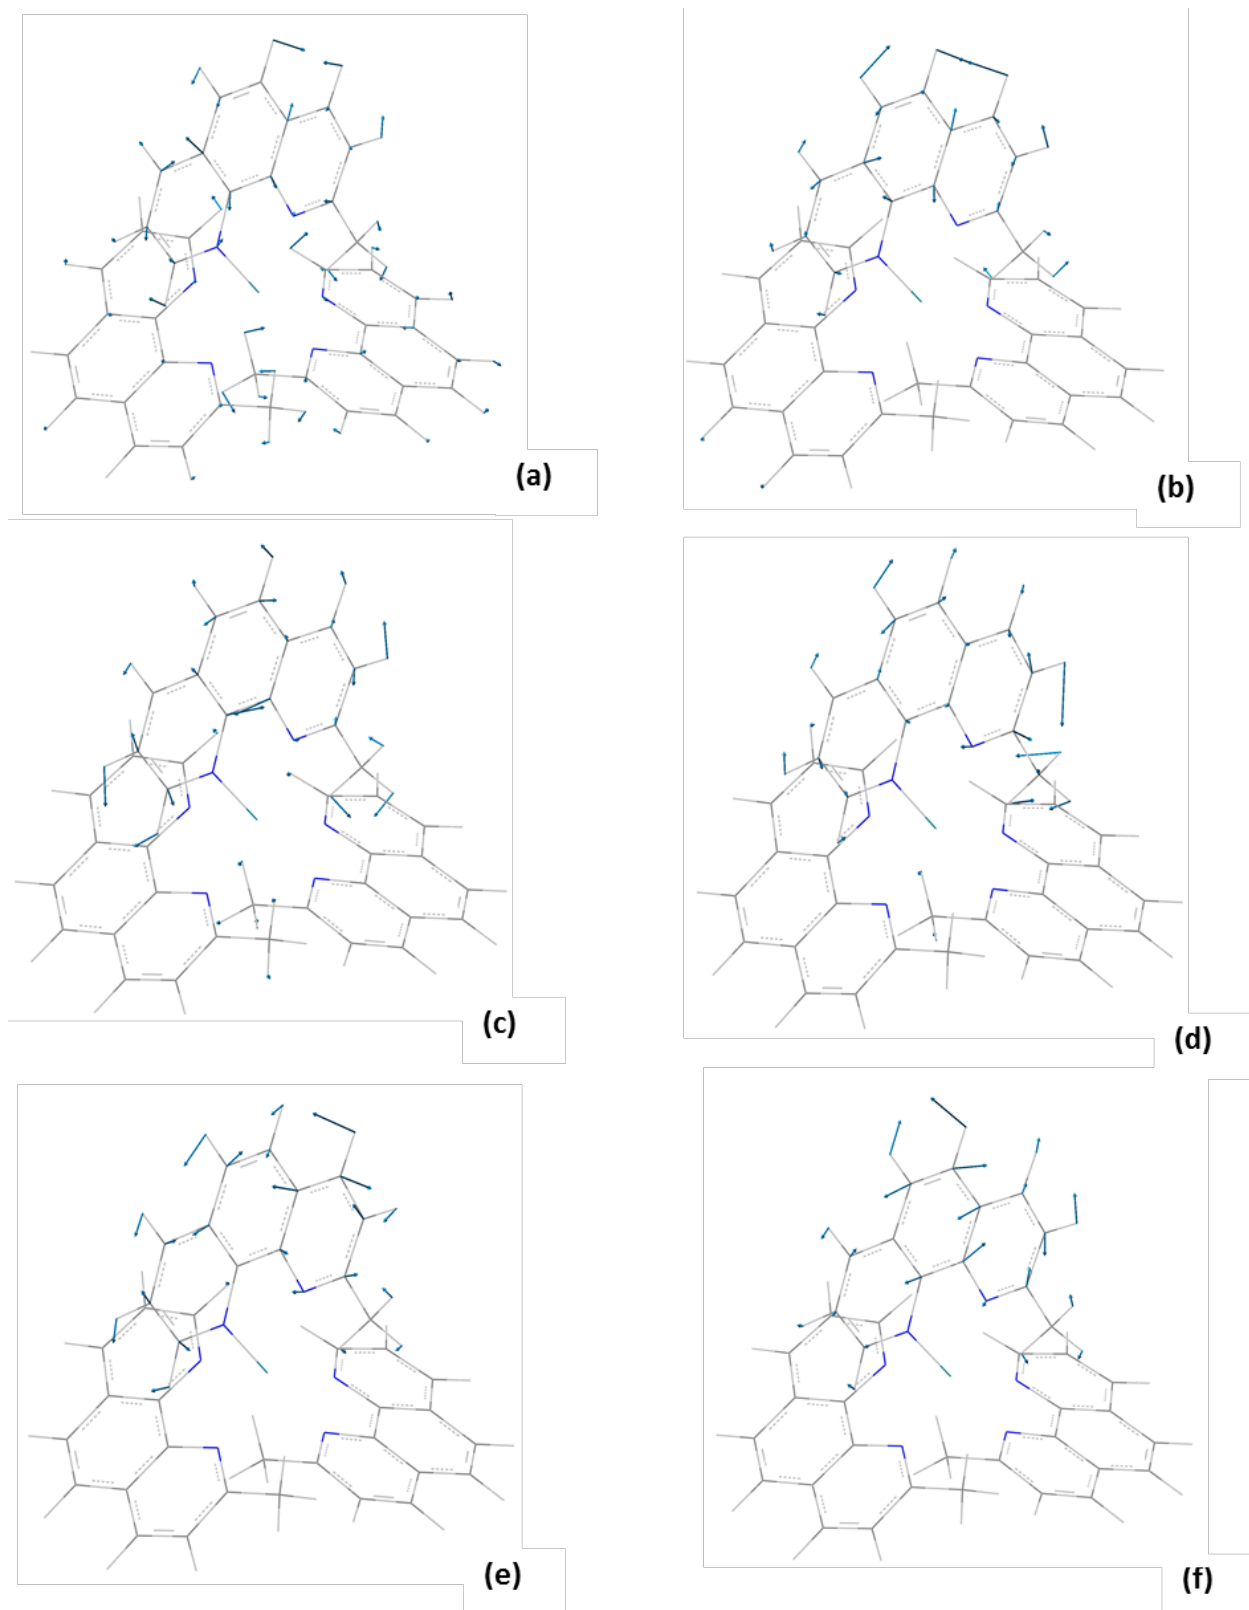

**Figure S7.** Some selected vibrational modes analysis of  $[\text{Ru}(\text{mphen})_3]^{2+}$  in the  $^3\text{MLCT}$  state at (a)  $1378\text{ cm}^{-1}$ , (b)  $1426\text{ cm}^{-1}$ , (c)  $1476\text{ cm}^{-1}$ , (d)  $1490\text{ cm}^{-1}$ , (e)  $1577\text{ cm}^{-1}$ , (f)  $1599\text{ cm}^{-1}$ . The vibrational modes are mainly localized on the negative charged ligand.

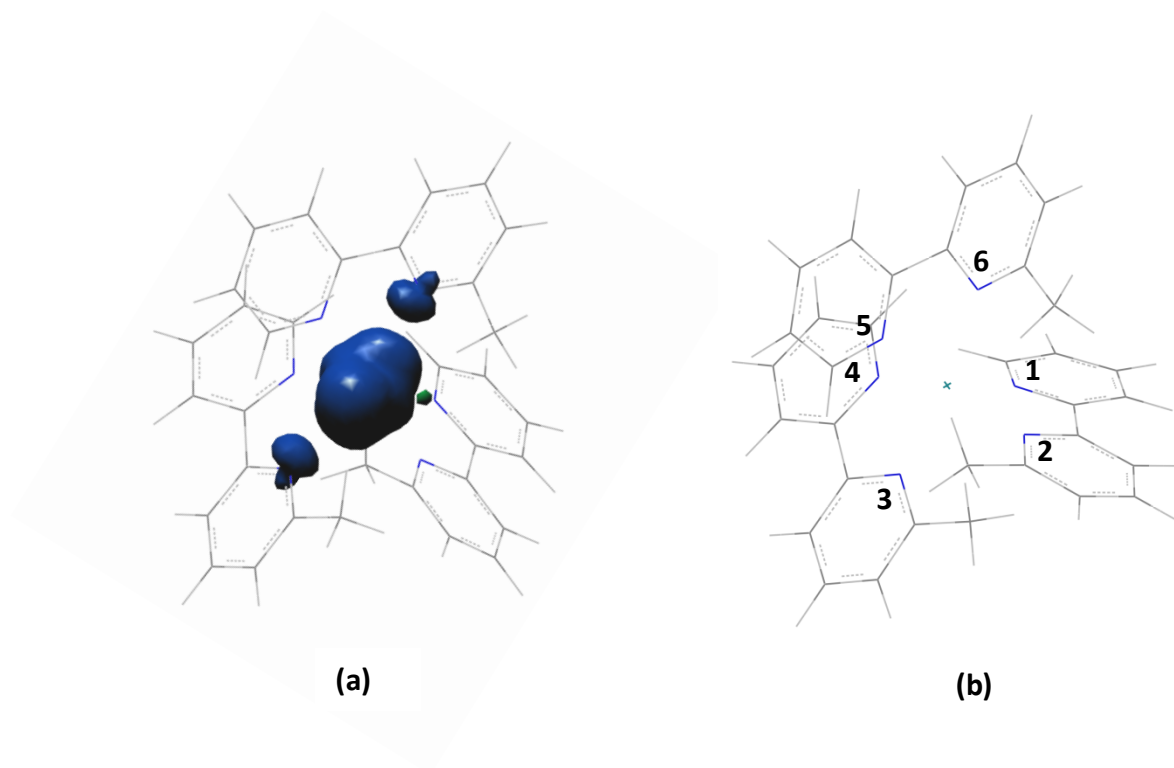

**Figure S8.** The spin density distribution of  $^3dd$  state of  $[\text{Ru}(\text{mbpy})_3]^{2+}$  under PCM model of acetonitrile.

## References

1. R. A. Palmer and T. S. Piper, *Inorg. Chem.*, 1966, **5**, 864.
2. D. Onggo, M. L. Scudder, D. C. Craig and H. A. Goodwin, *J. Mol. Struct.*, 2005, **738**, 129-136.
3. I. H. M. van Stokkum, D. S. Larsen and R. van Grondelle, *Biochimica Et Biophysica Acta-Bioenergetics*, 2004, **1658**, 262-262.
4. *MATLAB and Statistics Toolbox Release 2012b*, The MathWorks, Inc., Natick, Massachusetts, United States.
5. P. Hohenberg and W. Kohn, *Phys. Rev. B*, 1964, **136**, 864.
6. W. Kohn and L. Sham, *Phys. Rev. A*, 1965, **140**, 1133.
7. Gaussian 09 Revision C.01, M. J. Frisch, G. W. Trucks, H. B. Schlegel, G. E. Scuseria, M. A. Robb, J. R. Cheeseman, G. Scalmani, V. Barone, B. Mennucci, G. A. Petersson, H. Nakatsuji, M. Caricato, X. Li, H. P. Hratchian, A. F. Izmaylov, J. Bloino, G. Zheng, J. L. Sonnenberg, M. Hada, M. Ehara, K. Toyota, R. Fukuda, J. Hasegawa, M. Ishida, T. Nakajima, Y. Honda, O. Kitao, H. Nakai, T. Vreven, J. Montgomery, J. A., J. E. Peralta, F. Ogliaro, M. Bearpark, J. J. Heyd, E. Brothers, K. N. Kudin, V. N. Staroverov, R. Kobayashi, J. Normand, K. Raghavachari, A. Rendell, J. C. Burant, S. S. Iyengar, J. Tomasi, M. Cossi, N. Rega, J. M. Millam, M. Klene, J. E. Knox, J. B. Cross, V. Bakken, C. Adamo, J. Jaramillo, R. Gomperts, R. E. Stratmann, O. Yazyev, A. J. Austin, R. Cammi, C. Pomelli, J. W. Ochterski, R. L. Martin, K. Morokuma, V. G. Zakrzewski, G. A. Voth, P. Salvador, J. J. Dannenberg, S. Dapprich, A. D. Daniels, Ö. Farkas, J. V. J. B. Ortiz, J. Cioslowski, D. J. Fox and I. Gaussian, Wallingford CT, 2009.
8. P. J. Hay and W. R. Wadt, *J. Chem. Phys.*, 1985, **82**, 270-283.
9. T. H. Dunning and P. J. Hay, *Modern Theoretical Chemistry (Ed. H. F. Schaefer III)*, Vol. 3 (Plenum, New York, 1976), 1.
10. N. M. O'Boyle, A. L. Tenderholt and K. M. Langmer, *J. Comput. Chem.*, 2007, **29**, 839-845.
